# Supplementary material
Source: PubMed Central journal article supplement (PMC1794390)

**S1**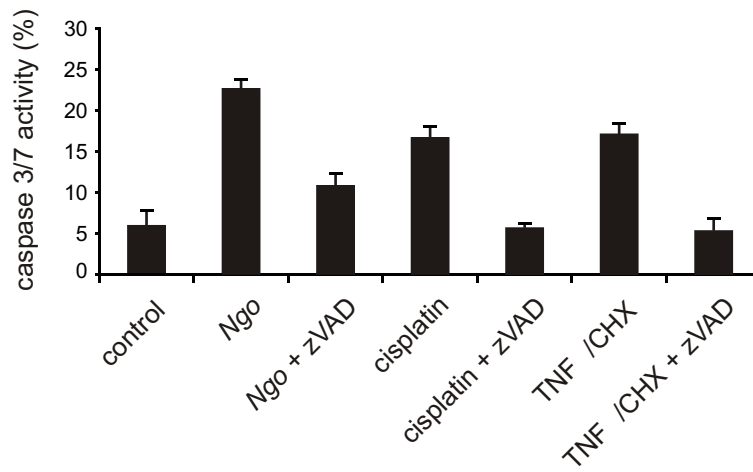**S2**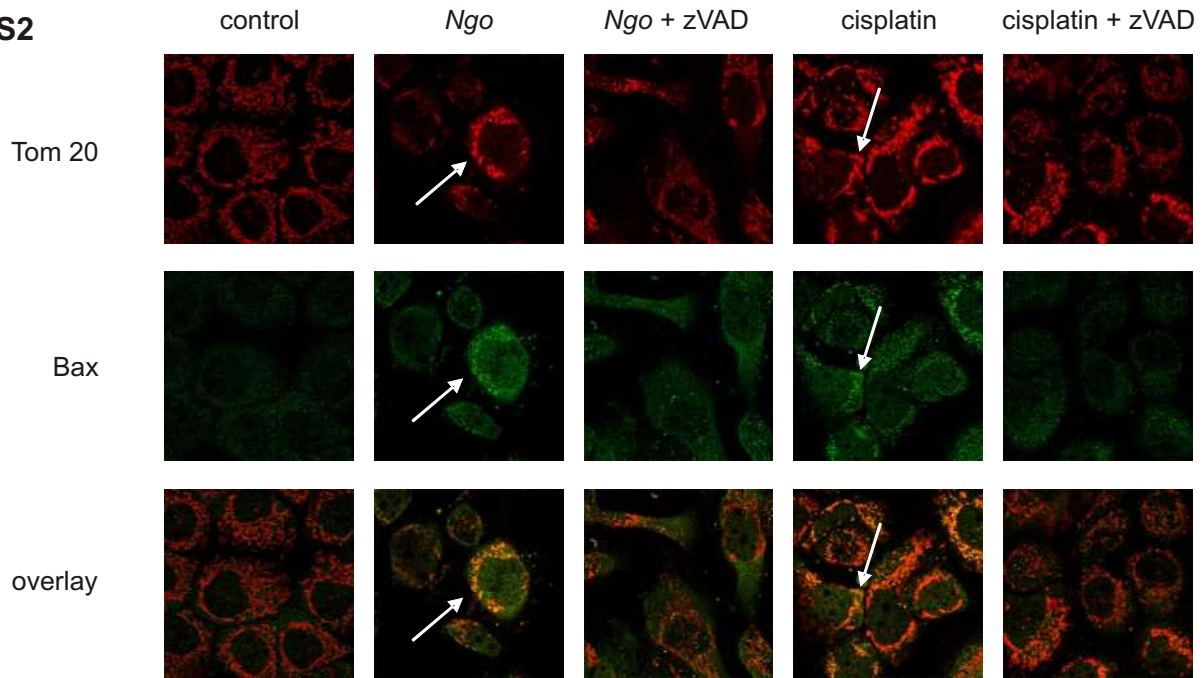**S3**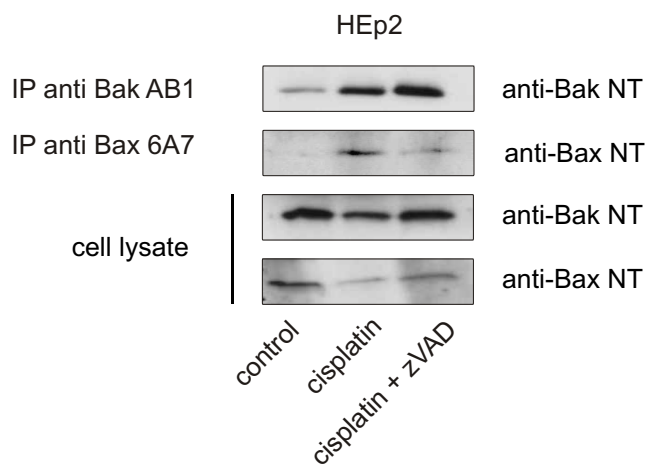**S4**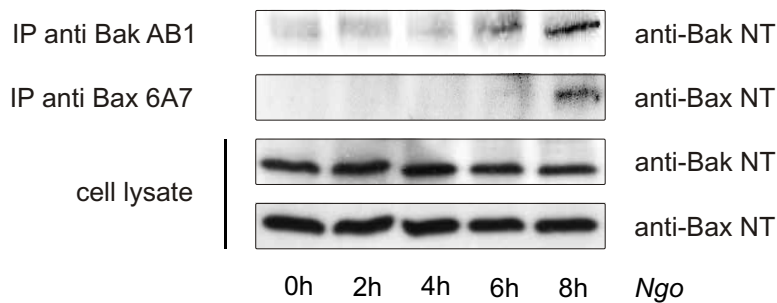

**S5**

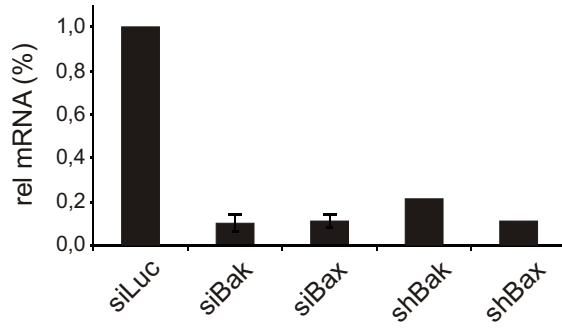

**S6A**

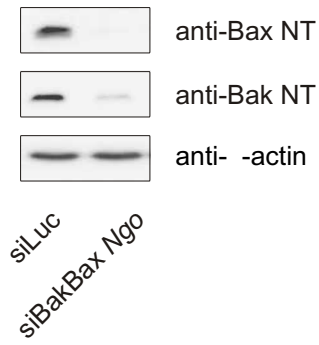

**S6B**

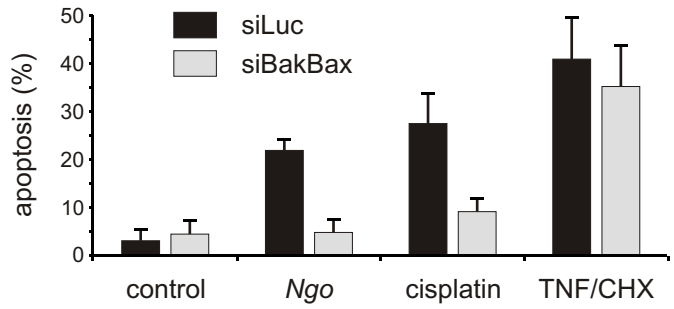

**S7A**

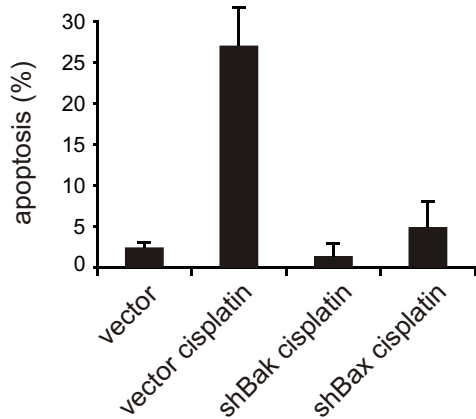

**S7B**

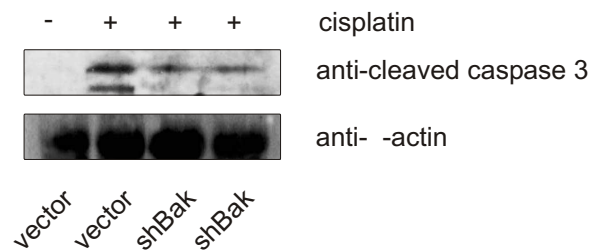

**S8**

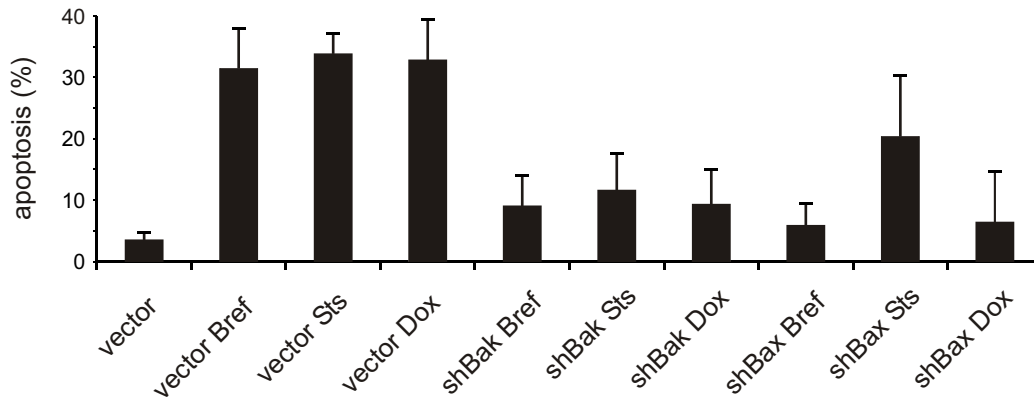

**S9**

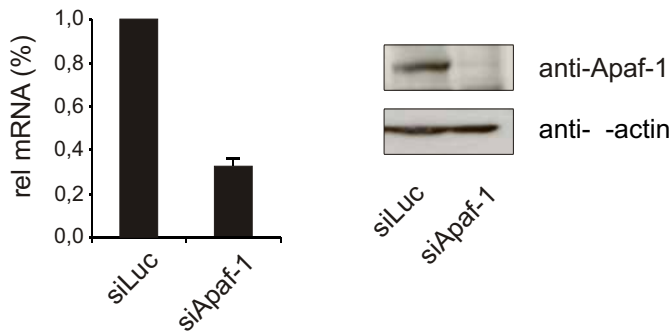

**S10**

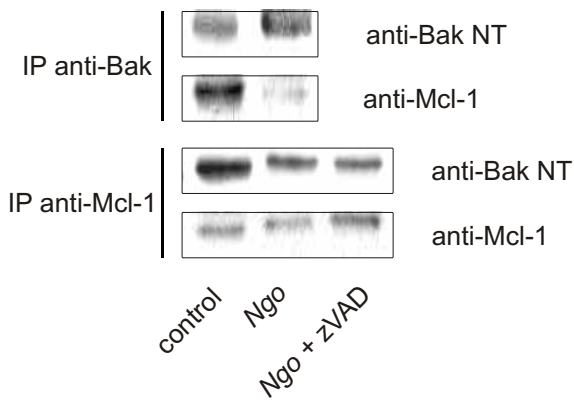

Supplement: 7601533s1.pdf [file 7601533s1.pdf]
